# Supplementary material for: Direct and steady state rate constants of C2H6 + X (X = H, Cl, OH): influence of the van der Waals well
Source: Royal Society of Chemistry journal article supplement (doi:10.1039/d3nj03012a), 2023-01-01
Supplement: d3nj03012a1.pdf [file d3nj03012a1.pdf]

## Supporting Information

### **The direct and steady state rate constants of $C_2H_6+X$ ( $X=H, Cl, OH$ ): Influence of van der Waals well**

Wanli Cheng and Wenji Wang\*

College of Chemistry & Pharmacy, Northwest A&F University, Yangling, 712100,

Shaanxi Province, P. R. China.

E-mail: [wjwang@nwafu.edu.cn](mailto:wjwang@nwafu.edu.cn)

1. The van der Waals well, the direct free energy barrier (from the reactants to transition state) and the steady state free energy barrier (from the van der Waals well to transition state) for the  $C_2H_6+H$ ,  $C_2H_6+Cl$  and  $C_2H_6+OH$  reactions in the temperature range of 250-1000 K.

Table S1. The van der Waals well, and the direct and steady state free energy barriers at different temperatures (kcal/mol)

| T(K) | $C_2H_6+H$ |       | $C_2H_6+Cl$  |        | $C_2H_6+OH$ |              |        |
|------|------------|-------|--------------|--------|-------------|--------------|--------|
|      | direct     | well  | steady state | direct | well        | steady state | direct |
| 250  | 11.29      | -1.22 | 1.37         | 0.15   | -3.32       | 5.17         | 1.85   |
| 300  | 12.15      | -1.26 | 1.68         | 0.42   | -3.39       | 5.90         | 2.51   |
| 400  | 13.53      | -1.36 | 2.21         | 0.85   | -3.45       | 7.26         | 3.81   |
| 500  | 14.75      | -1.43 | 2.67         | 1.24   | -3.44       | 8.17         | 4.73   |
| 600  | 16.19      | -1.54 | 3.11         | 1.57   | -3.39       | 9.05         | 5.66   |
| 800  | 18.22      | -1.74 | 3.80         | 2.06   | -3.38       | 10.45        | 7.07   |
| 1000 | 20.23      | -1.91 | 4.28         | 2.37   | -3.47       | 11.61        | 8.14   |

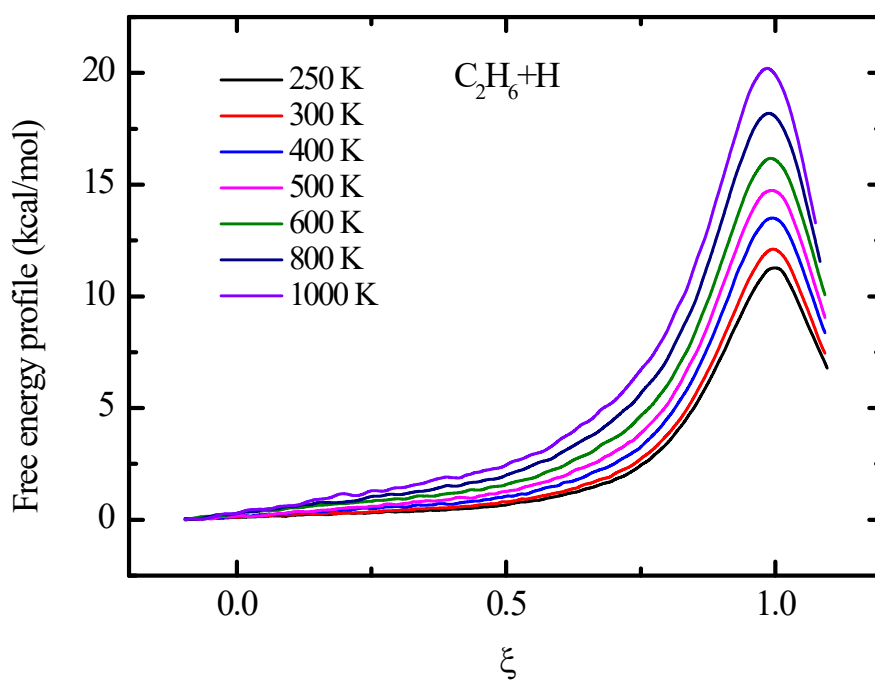

Fig. S1 Free energy profile for the  $C_2H_6+H$  reaction along the reaction path.

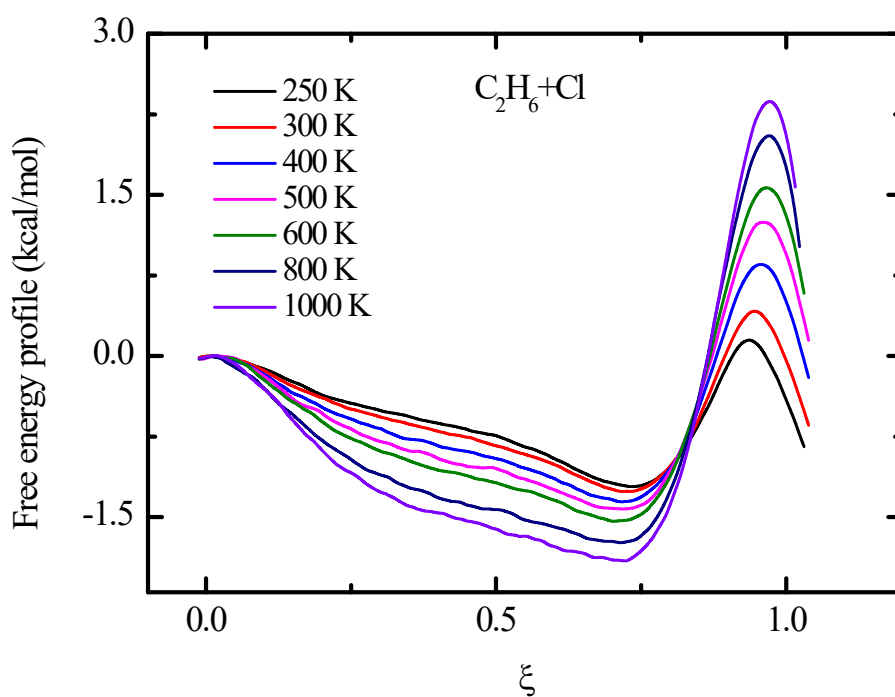

Fig. S2 Free energy profile for the  $C_2H_6 + Cl$  reaction along the reaction path.

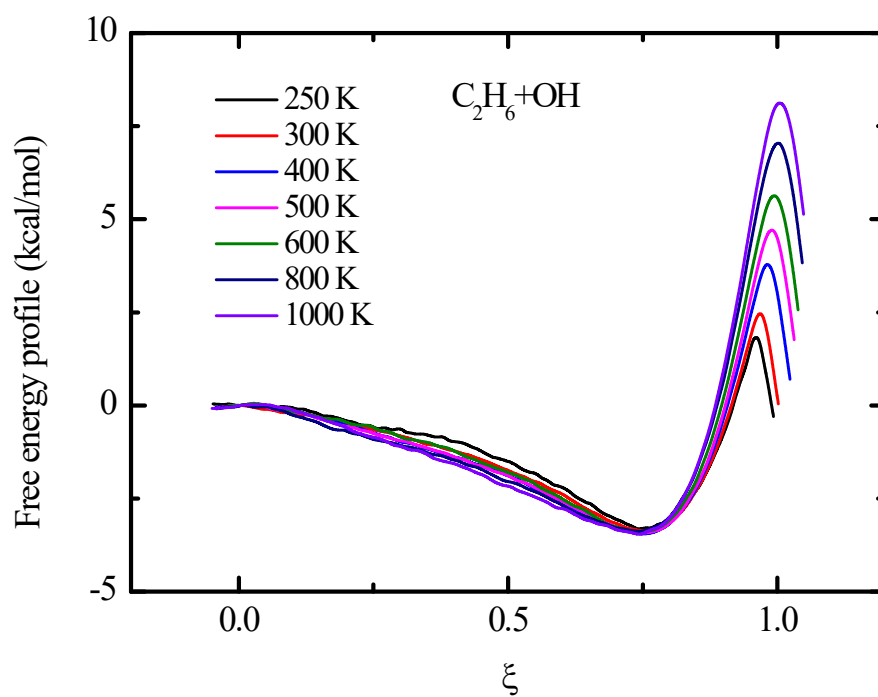

Fig. S3 Free energy profile for the  $C_2H_6 + OH$  reaction along the reaction path.

2. For the classical transition state theory, the formulas of direct and steady state rate constants are given by

$$k_{\text{direct}} = \frac{k_{\text{B}}T}{h} \cdot e^{-[(G_{\text{TS}}-G_{\text{R}})/k_{\text{B}}T]} \quad (\text{S1})$$

$$k_{\text{steady}} = K \cdot k_2 = e^{-[(G_{\text{RC}}-G_{\text{R}})/k_{\text{B}}T]} \cdot \frac{k_{\text{B}}T}{h} \cdot e^{-[(G_{\text{TS}}-G_{\text{RC}})/k_{\text{B}}T]} = \frac{k_{\text{B}}T}{h} \cdot e^{-[(G_{\text{TS}}-G_{\text{R}})/k_{\text{B}}T]} = k_{\text{direct}} \quad (\text{S2})$$

where  $G_{\text{R}}$ ,  $G_{\text{RC}}$  and  $G_{\text{TS}}$  represent the free energies of reactants, reactant complex and transition state, respectively.

It is clear that the direct and steady state rate constants are the same in the classical transition state theory without considering the tunneling effect.
